# Supplementary material for: C-type natriuretic peptide moderates titin-based cardiomyocyte stiffness
Source: PubMed Central journal article supplement (PMC7710274; doi:10.1172/jci.insight.139910), 2020-11-19
Supplement: jciinsight-5-139910-s021.pdf [file jciinsight-5-139910-s021.pdf]

**Supplemental Table 1.** CNP infusion does not alter arterial blood pressure and left ventricular systolic and diastolic function under resting conditions.

|                                                                  | <b>Vehicle</b> | <b>CNP</b>   |
|------------------------------------------------------------------|----------------|--------------|
| Plasma CNP, ng/ml                                                | 0.31 ± 0.05    | 0.54 ± 0.09* |
| <b>Blood pressure (tail cuff, awake mice)</b>                    |                |              |
| SBP, mmHg                                                        | 111 ± 3        | 109 ± 3.2    |
| DBP, mmHg                                                        | 75 ± 3         | 73 ± 6.1     |
| <b>LV function (invasive catheterization, anesthetized mice)</b> |                |              |
| Heart rate, bpm                                                  | 506 ± 17       | 490.7 ± 24   |
| Ejection fraction, %                                             | 49 ± 2.3       | 51 ± 3.6     |
| dP/dt <sub>max</sub> , mmHg/sec                                  | 10348 ± 880    | 9784 ± 1077  |
| dP/dt <sub>min</sub> , mmHg/sec                                  | 9570 ± 654     | 9030 ± 963   |
| Stroke volume, µl                                                | 14.1 ± 0.8     | 14.3 ± 0.34  |
| End-diastolic Vol, µl                                            | 28.1 ± 1.9     | 28.2 ± 2.1   |
| End-systolic Vol, µl                                             | 16.8 ± 1.2     | 15.0 ± 1.9   |
| EDPVR, mmHg/µl                                                   | 0.48 ± 0.6     | 0.43 ± 0.1   |

Cardiovascular parameters of vehicle and CNP-treated C57Bl6 mice. Systolic (SBP) and diastolic (DBP) blood pressure of trained mice was measured by tail-cuff plethysmography (6 mice per group). Left ventricular function of anesthetized mice was measured by invasive haemodynamics (8 mice per group). Tested with Student t test.

**Supplemental Table 2.** Mice with cardiomyocyte-restricted deletion of the GC-B receptor (CM GC-B KO) have unaltered blood pressure and left ventricular systolic and diastolic function under resting conditions.

|                                                                  | <b>Control mice</b> | <b>CM GC-B KO mice</b> |
|------------------------------------------------------------------|---------------------|------------------------|
| <b>Blood pressure (tail cuff, awake mice)</b>                    |                     |                        |
| SBP, mmHg                                                        | 106 ± 4             | 107 ± 4                |
| DBP, mmHg                                                        | 74 ± 6              | 77 ± 6                 |
| <b>LV function (invasive catheterization, anesthetized mice)</b> |                     |                        |
| Heart rate, bpm                                                  | 557 ± 10            | 566 ± 7                |
| Ejection fraction, %                                             | 58 ± 3.3            | 64 ± 1.6               |
| dP/dt <sub>max</sub> , mmHg/sec                                  | 10530 ± 180         | 11525 ± 430            |
| dP/dt <sub>min</sub> , mmHg/sec                                  | 10896 ± 427         | 11835 ± 363            |
| Stroke volume, µl                                                | 14.6 ± 1.3          | 13.3 ± 2.8             |
| End-diastolic Vol, µl                                            | 24.0 ± 1.3          | 21.0 ± 4.1             |
| End-systolic Vol, µl                                             | 12.8 ± 0.2          | 11.0 ± 1.2             |
| EDPVR, mmHg/µl                                                   | 0.44 ± 0.4          | 0.38 ± 0.09            |
| <b>Necropsy</b>                                                  |                     |                        |
| Body weight, g                                                   | 23.7 ± 0.5          | 23.9 ± 0.9             |
| Heart weight, mg                                                 | 121.2 ± 1.7         | 121.3 ± 4.5            |
| Tibia length, mm                                                 | 1.8 ± 0.02          | 1.78 ± 0.02            |

Baseline cardiovascular parameters of control and CM GC-B KO mice. Systolic (SBP) and diastolic (DBP) blood pressure of trained awake control and CM GC-B KO mice was measured by tail-cuff plethysmography (7 mice per group). Left ventricular function of anesthetized mice was measured by invasive haemodynamics (4 mice per group). Tested with Student t test

|                                                     | Sham             |                        | TAC 3 days       |                        | TAC 2 weeks      |                        |
|-----------------------------------------------------|------------------|------------------------|------------------|------------------------|------------------|------------------------|
|                                                     | CTRL<br>(n = 14) | CM GC-B KO<br>(n = 13) | CTRL<br>(n = 11) | CM GC-B KO<br>(n = 14) | CTRL<br>(n = 17) | CM GC-B KO<br>(n = 19) |
| <b>Aorta</b><br>Max Aortic Pressure<br>(mmHg)       | 112.6 ± 1.4      | 111.0 ± 2.3            | 147.2 ± 4.2*     | 142.8 ± 4.4*           | 158.2 ± 4.0*     | 160.0 ± 4.8*           |
| <b>Left Ventricle</b><br>Cardiac Output<br>(µl/min) | 8618.5 ± 537.6   | 9365.2 ± 341.2         | 7090 ± 865.1     | 6749.6 ± 414.7*        | 6816.8 ± 551.9   | 7099.6 ± 448.6*        |
| Stroke Volume<br>(µl)                               | 16.50 ± 0.95     | 17.47 ± 0.69           | 12.32 ± 1.65     | 11.42 ± 0.70*          | 12.43 ± 1.02     | 12.22 ± 1.09*          |
| P <sub>max</sub><br>(mmHg)                          | 109.7 ± 1.7      | 108.5 ± 2.5            | 141.7 ± 4.3*     | 136.1 ± 4.7*           | 159.0 ± 4.4*     | 155.5 ± 3.5*           |
| Heart rate<br>(bpm)                                 | 527.8 ± 12.3     | 543.1 ± 14.5           | 584.7 ± 15.6     | 593.1 ± 9.8            | 555.6 ± 14.3     | 579.5 ± 10.1           |
| Ejection fraction<br>(%)                            | 56.19 ± 3.18     | 55.96 ± 2.50           | 38.16 ± 5.53     | 27.41 ± 2.42*          | 49.65 ± 3.18     | 37.23 ± 2.56*          |
| Tau<br>(msec)                                       | 6.06 ± 0.25      | 5.85 ± 0.21            | 8.45 ± 0.90*     | 9.14 ± 0.54*           | 7.29 ± 0.43      | 8.15 ± 0.44*           |

**Supplemental Table 3: Hemodynamic parameters of control and CM GC-B KO mice after 3 or 14 days of TAC or sham operation.** Data are shown as mean ± SEM. *n* = 11–19/group. \**P* < 0.05 vs respective sham mice. Aortic pressure (proximal to the surgical stenosis), LV P<sub>max</sub> and Tau were evaluated by 2-way ANOVA with Bonferroni multiple comparison *t* test; the other parameters were tested with Kruskal Wallis Analysis.
