# Supplementary material for: C-type natriuretic peptide moderates titin-based cardiomyocyte stiffness
Source: JCI Insight. 2020 Nov 19;5(22):e139910. doi: 10.1172/jci.insight.139910 (PMC7710274; doi:10.1172/jci.insight.139910)
Supplement: supplemental data [file jciinsight-5-139910-s020.pdf]

Supplemental Figure 1

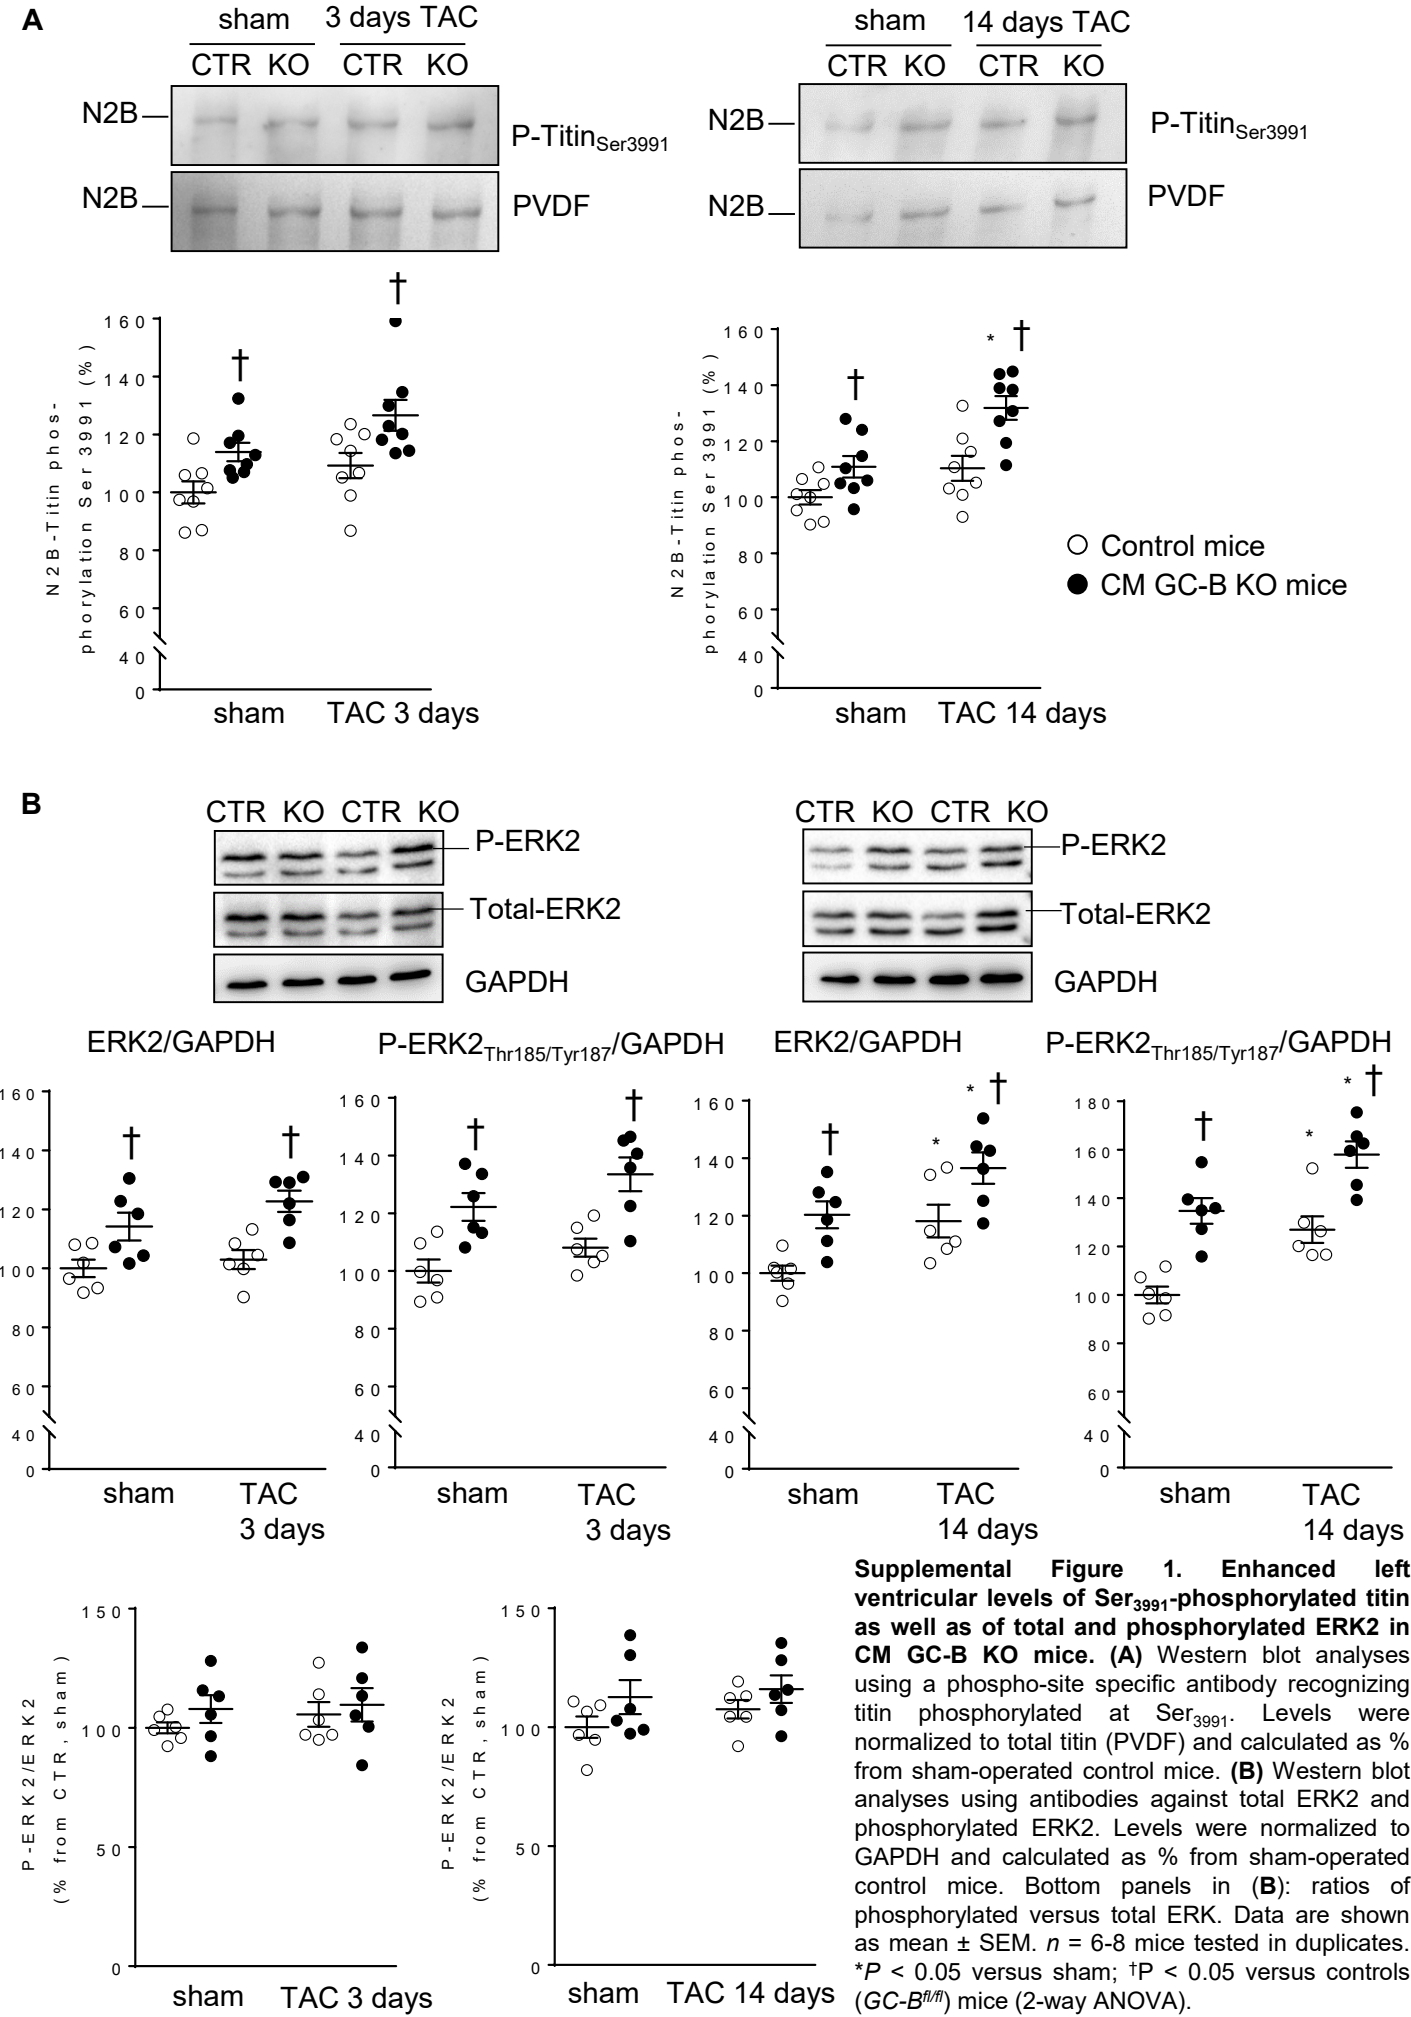

Supplemental Figure 2

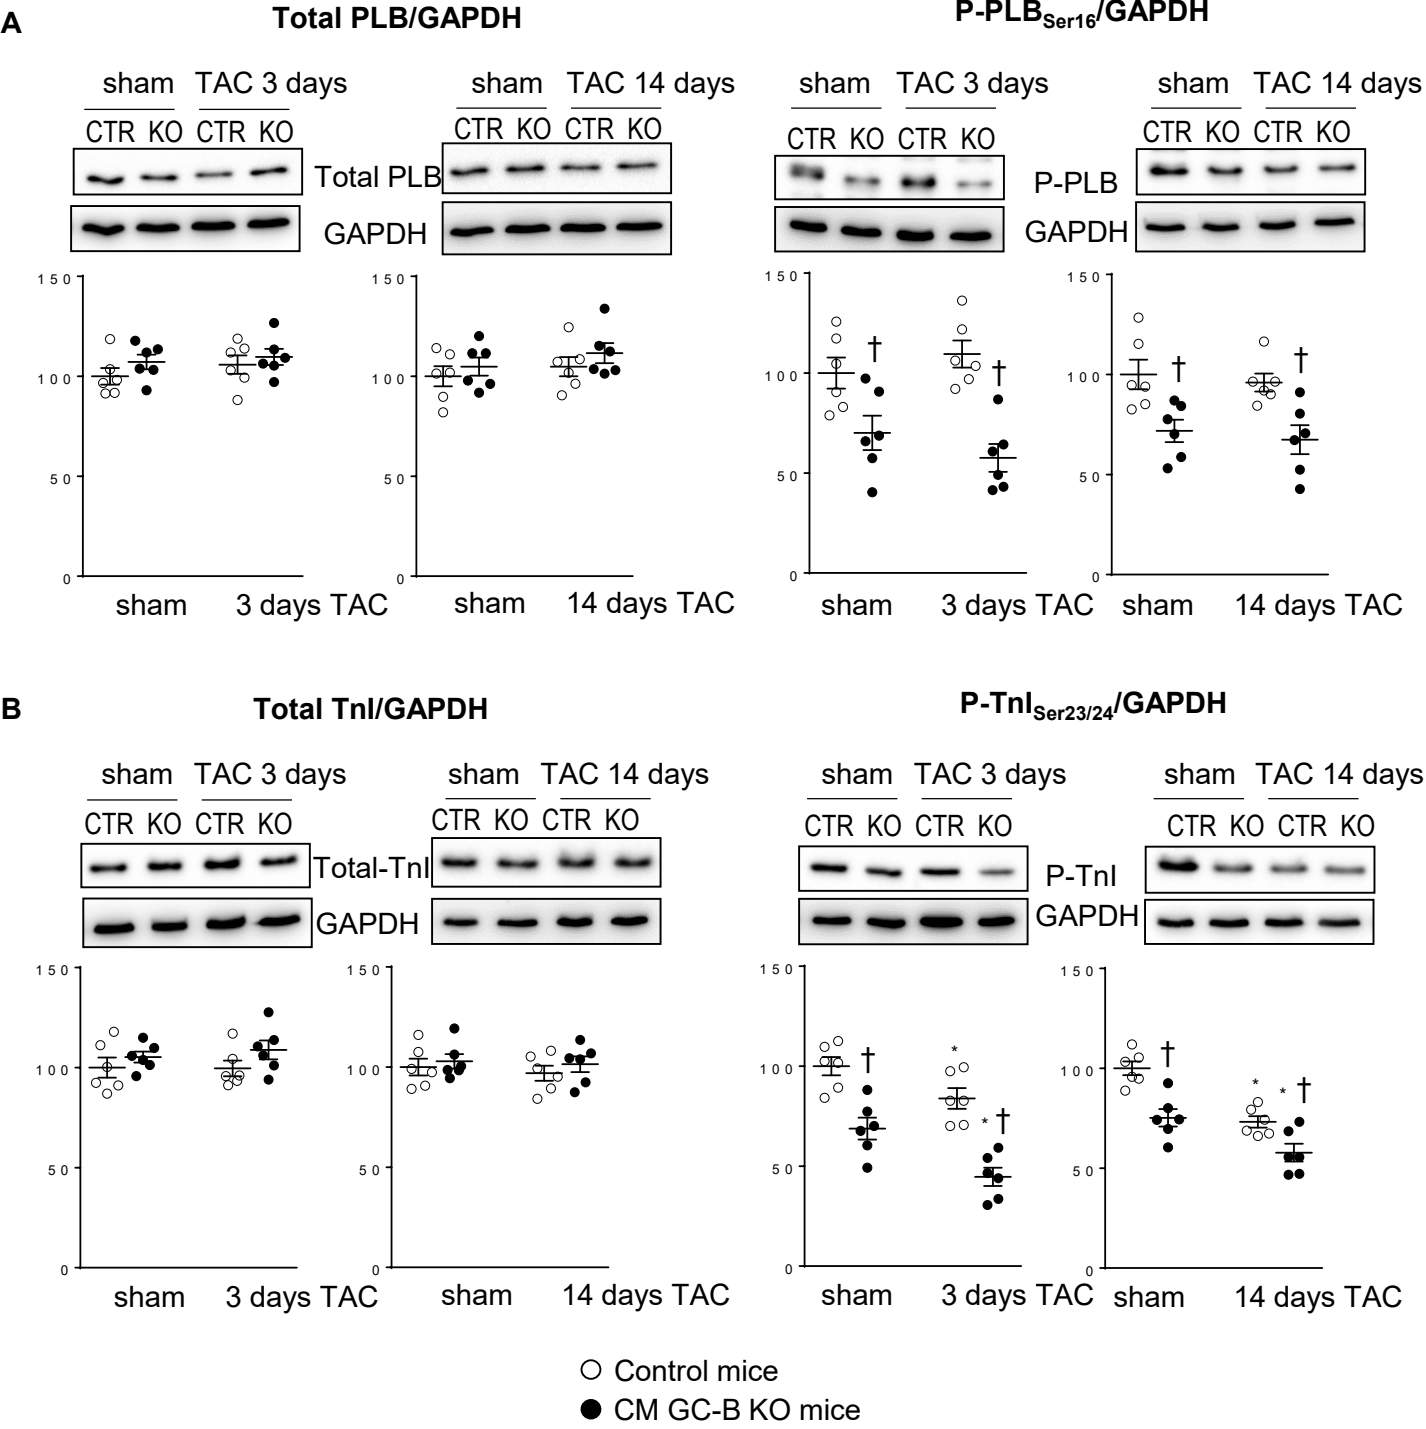

**Supplemental Figure 2. Reduced left ventricular levels of Serine<sub>16</sub>-phosphorylated phospholamban and Serine<sub>23/24</sub>-phosphorylated troponin I in CM GC-B KO mice under sham and TAC conditions.** (A) Western blot analyses using antibodies against total phospholamban (PLB, left panels) and phosphorylated PLB (P-Serine<sub>16</sub>, right panels). (B) Western blot analyses using antibodies against total troponin I (Tnl, left panels) and phosphorylated Tnl (Serine<sub>23/24</sub>, right panels). Target protein levels were normalized to GAPDH and calculated as percent (%) from sham-operated control mice. Means ± SEM. *n* = 6 mice per group tested in duplicates. \**P* < 0.05 versus respective sham mice, †*P* < 0.05 versus control (*GC-B<sup>f/f</sup>*) mice (2-way ANOVA).
